# Supplementary material for: Research Progress Related to Aflatoxin Contamination and Prevention and Control of Soils
Source: MDPI journal article supplement (doi:10.3390/toxins15080475), 2023-07-25
Supplement: s1 [file s1]

# Supplementary Materials: Research Progress Related to Aflatoxin Contamination and Prevention and Control of Soils

Xue Wang, Dun Wang, Shujuan Zhang, Mengjie Zhu, Qing Yang, Jing Dong, Qi Zhang and Peng Feng

**Table S1.** Types of post-harvest aflatoxin detoxification

| Methods            | Degradation rate         | Application | Insufficient                                                                                                                                                                 | Refs.                                                                                                                                                                              |      |
|--------------------|--------------------------|-------------|------------------------------------------------------------------------------------------------------------------------------------------------------------------------------|------------------------------------------------------------------------------------------------------------------------------------------------------------------------------------|------|
| Physical methods   | Mechanical methods       | 90%         | Feed, food, etc.                                                                                                                                                             | Time consuming, resulting in a lot of waste                                                                                                                                        | [81] |
|                    | Adsorption methods       | 92%         | Feed, food, edible oil, etc.                                                                                                                                                 | Can attract nutrients and reduce value                                                                                                                                             | [82] |
|                    | Glucomannan adsorption   | 100%        | A compound detoxification agent is prepared and applied to feed to achieve in vitro detoxification of animals.                                                               | Not found                                                                                                                                                                          | [83] |
| Chemical methods   | Ozone treatment          | 93%         | Used in small quantities in foods such as peanuts, cornmeal and chillies.                                                                                                    | The treatment of small quantities is effective, but large quantities tend to change the nature of the food and deteriorate the taste, and the process is costly and time-consuming | [84] |
|                    | Ammonia treatment        | 95%         | Used in the storage of grain in silos, this structure facilitates the use of ammonia fumigation and facilitates the recovery and removal of aflatoxin from food ingredients. | Ammonia can be harmful to human health and the environment, and can also damage the quality of food                                                                                | [85] |
|                    | Essential oil fumigation | 98%         | Used on maize, rice, peanuts, etc. Simple and easy to use, suitable for home use and has no effect on the quality and nutritional content of the food.                       | Longer processing times, higher costs and non-recyclable                                                                                                                           | [86] |
| Biological methods | Bioenzyme digestion      | 96%         | Used on peanut meal feed.                                                                                                                                                    | Additional additives are required to improve the detoxification effect and the treatment time is longer                                                                            | [87] |
|                    | Microbial adsorption     | 99%         | Suitable for use in feeds where certain nutrients can be added. Anaerobic culture of peanut meal with live lactic acid bacteria.                                             | Harsh conditions                                                                                                                                                                   | [88] |
